# Supplementary material for: Strain forces tuned the electronic and optical properties in GaTe/MoS2 van der Waals heterostructures
Source: Royal Society of Chemistry journal article supplement (doi:10.1039/d0ra04643d), 2020-01-01
Supplement: d0ra04643d1.pdf [file d0ra04643d1.pdf]

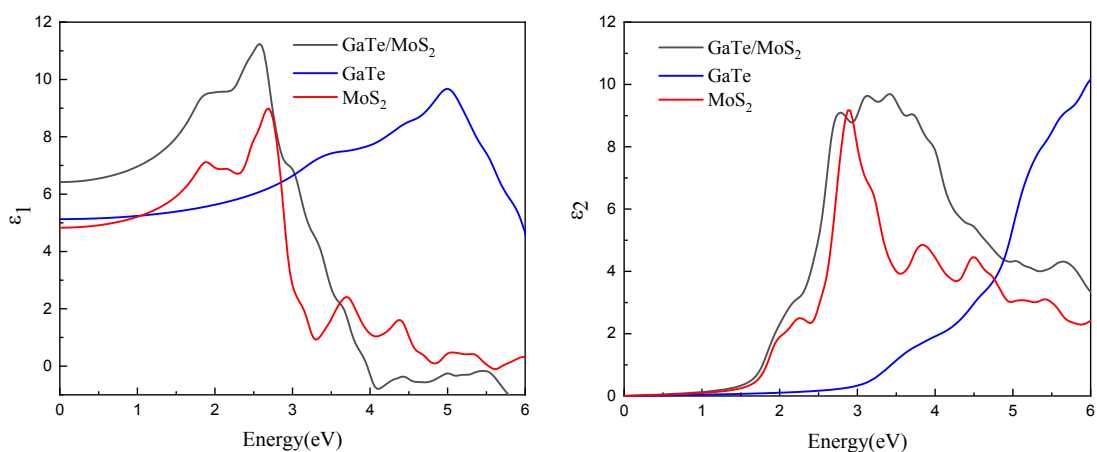

Fig. S1. The real part  $\epsilon_1(\omega)$  and the imaginary part  $\epsilon_2(\omega)$  of the dielectric constants for MoS<sub>2</sub>, GaTe, and GaTe/MoS<sub>2</sub> vdWH, respectively. In the visible light region, the imaginary part of the dielectric constant of MoS<sub>2</sub> is larger than that of the GaTe. Also, the value of  $\epsilon_1(\omega)$  in the GaTe/MoS<sub>2</sub> vdWH is the largest one in these three cases. The analysis of  $\epsilon_2(\omega)$  is similar to that of  $\epsilon_1(\omega)$ .

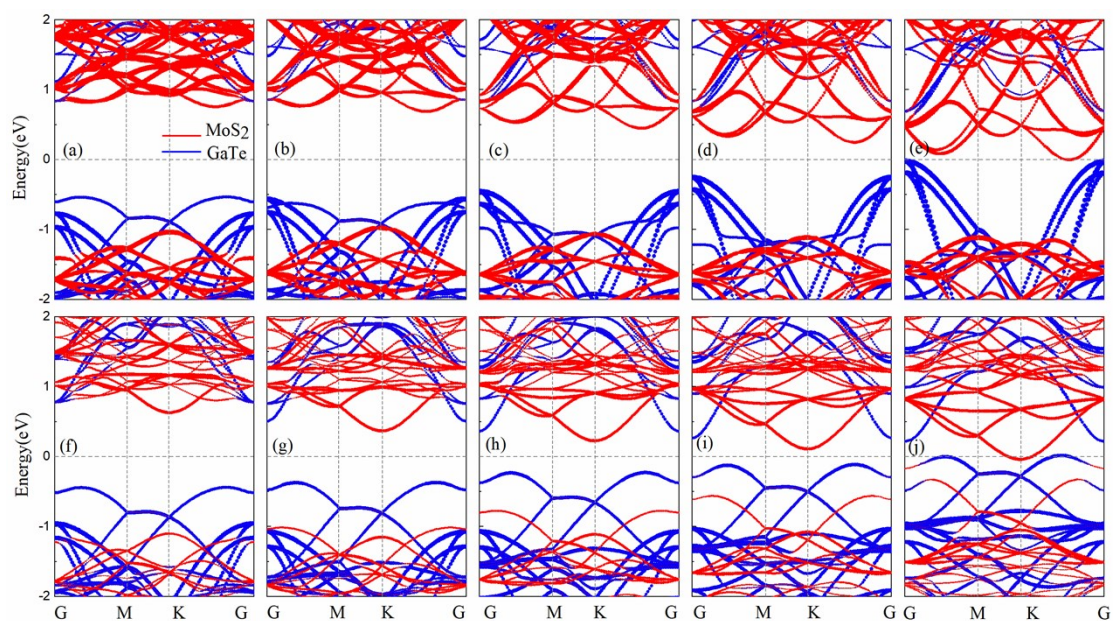

Fig. S2. Band structures of the GaTe/MoS<sub>2</sub> vdWH under compressive biaxial strains (a) -1%, (b) -3%, (c) -5%, (d) -7%, (e) -9% and tensile biaxial strains (f) 1%, (g) 3%, (h) 5%, (i) 7%, (j) 9%.
